# Supplementary material for: Measurement report: Temporal variability of vertical profiles of CO 2 and CH 4 over urban environment
Source: Copernicus journal article supplement (doi:10.5194/egusphere-2024-1167), 2024-05-06
Supplement: Supplementary file 1 [file egusphere-2024-1167-supplement.pdf]

**Table S1.** Sensors importance in balloon and UAV-based campaigns.

| UAV-based campaign |                     |                   |                      |                         |
|--------------------|---------------------|-------------------|----------------------|-------------------------|
| Sensor/Parameter   | Air temperature     | Relative humidity | Atmospheric pressure | Wind speed              |
| Default            | Thermocouple type T | BME280            | BME280               | TriSonica <sup>TM</sup> |
| Option 1           | BME280              | -                 | -                    | -                       |
| Balloon campaign   |                     |                   |                      |                         |
| Sensor/Parameter   | Air temperature     | Relative humidity | Atmospheric pressure | Wind speed              |
| Default            | Thermocouple type T | BME280            | BME280               | HY-WDC6SE               |
| Option 1           | BME280              | HY-WDC6SE         | HY-WDC6SE            | TriSonica <sup>TM</sup> |
| Option 2           | HY-WDC6SE           | -                 | -                    | -                       |

**Table S2.** Sensors used in UAV-based and balloon campaigns.

| No. | Platform | Air temp.    | Rel. Hum. | Atm. Pressure | Wind speed                            |
|-----|----------|--------------|-----------|---------------|---------------------------------------|
| 1   | BAL      | HY-WDC6SE    | HY-WDC6SE | HY-WDC6SE     | HY-WDC6SE                             |
| 2   | BAL      | Thermocouple | BME280    | BME280        | HY-WDC6SE                             |
| 3   | BAL      | Thermocouple | BME280    | BME280        | HY-WDC6SE (TriSonicaTM - 1 flight)    |
| 4   | BAL      | Thermocouple | BME280    | BME280        | HY-WDC6SE                             |
| 5   | BAL      | Thermocouple | BME280    | BME280        | HY-WDC6SE                             |
| 6   | DRO      | Thermocouple | BME280    | BME280        | TriSonicaTM                           |
| 7   | BAL      | Thermocouple | BME280    | BME280        | HY-WDC6SE and TriSonicaTM (7 flights) |
| 8   | BAL      | Thermocouple | BME280    | BME280        | HY-WDC6SE                             |
| 9   | BAL      | Thermocouple | BME280    | BME280        | HY-WDC6SE                             |
| 10  | DRO      | Thermocouple | BME280    | BME280        | TriSonicaTM                           |
| 11  | DRO      | Thermocouple | BME280    | BME280        | TriSonicaTM                           |

<https://www.overleaf.com/project/627b8d5ccf85b0d9dc199747>

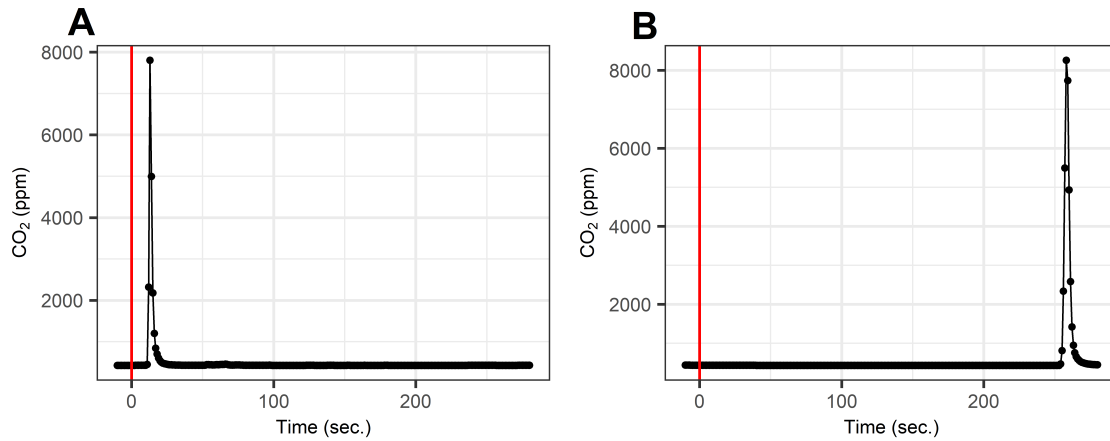

**Figure S1.** Evolution of 1s averaged CO<sub>2</sub> mole fraction during breath test as measured by the Picarro analyser with tube of (A) 10 m and (B) 200 m length. The vertical red line represents the moment of exhalation of air to the tube.

2

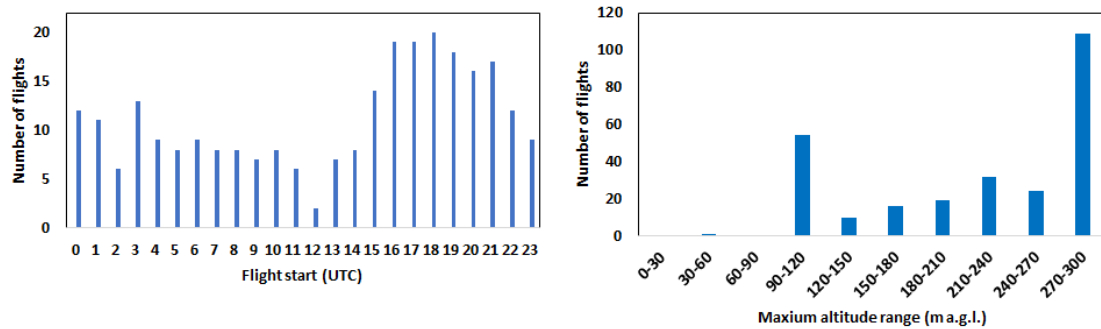

**Figure S2.** Flight characteristics: (a) flight take-off; (b) maximum flight altitude.

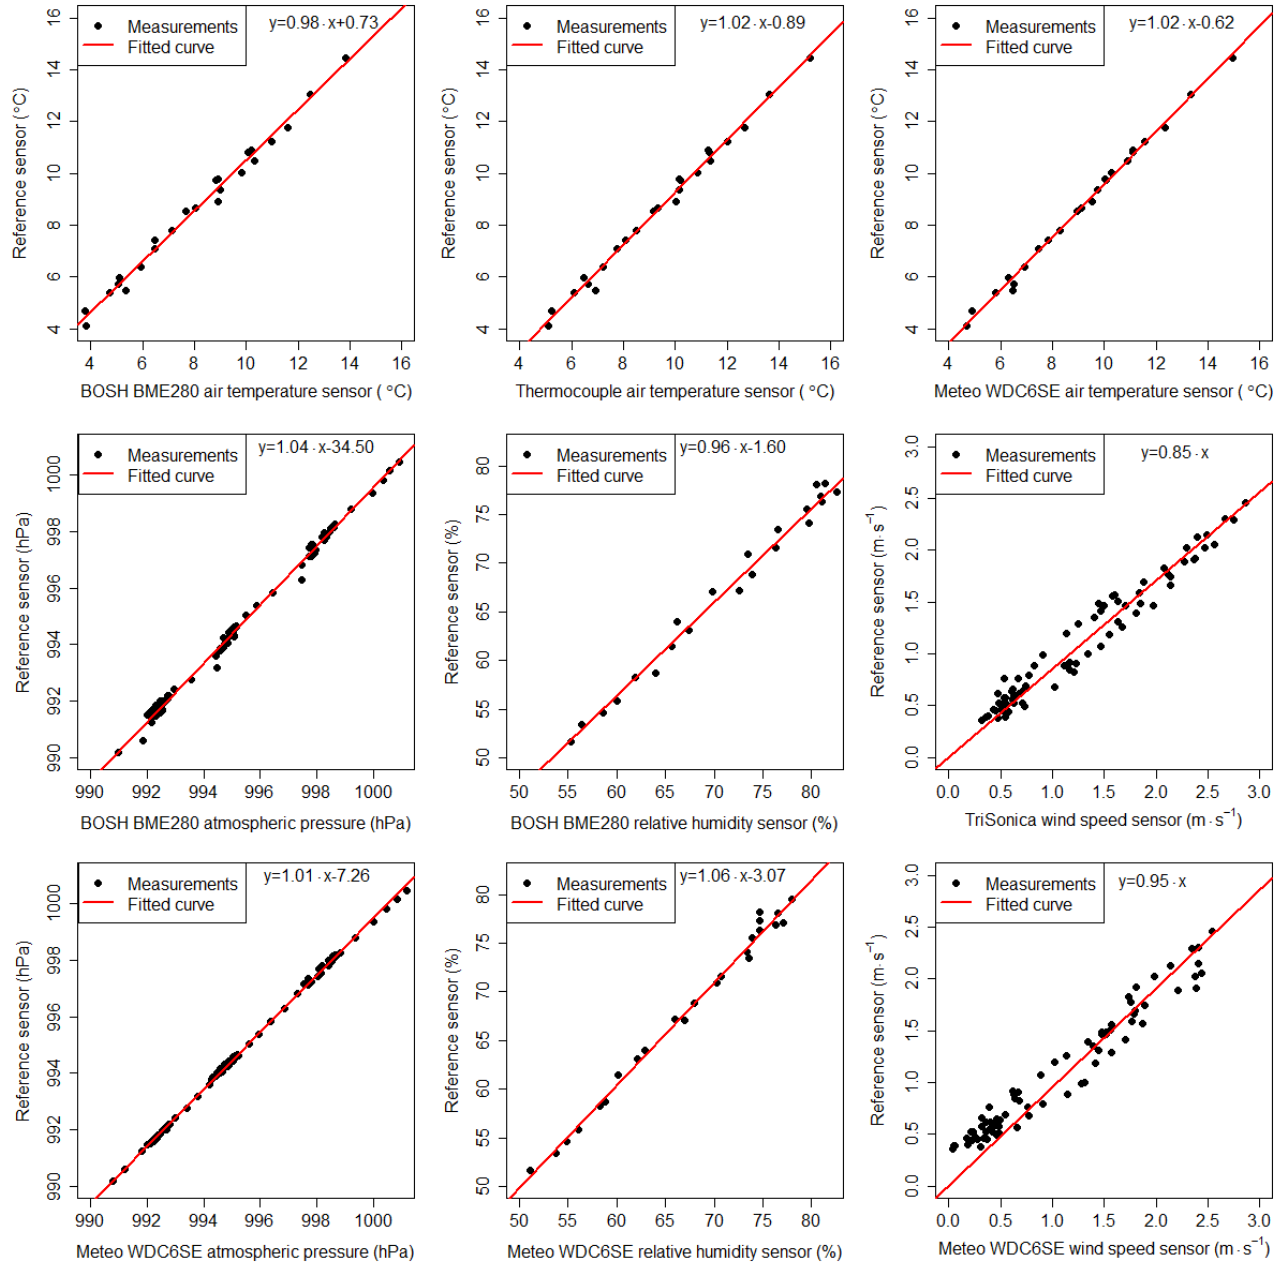

**Figure S3.** Calibration of meteorological sensors used in the measurements, the temporal resolution of all parameters is equal to 1 hour.

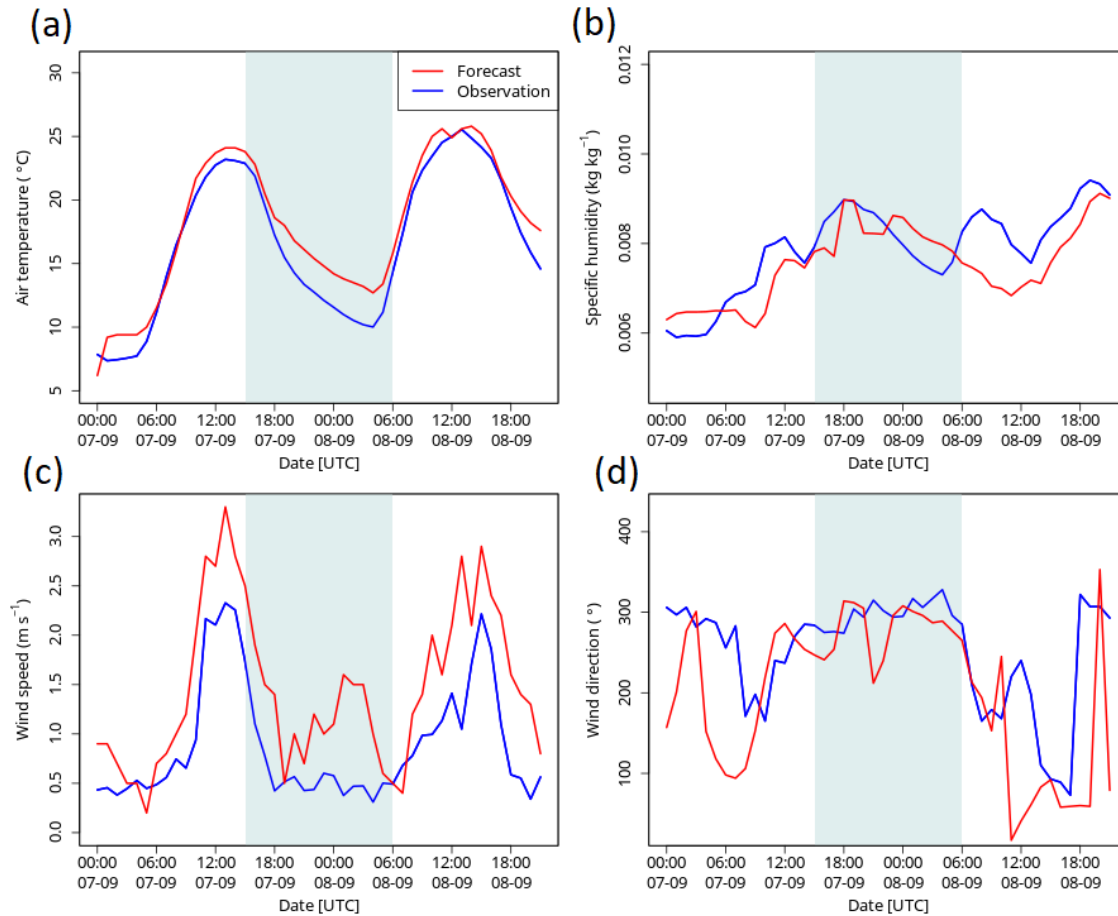

**Figure S4.** Time course of predicted and observed (a) air temperature at 2 m a.g.l., (b) specific humidity at 2 m a.g.l., (c) wind speed at 20 m a.g.l. and (d) wind direction at 20 m a.g.l. for Reymonta St. station between 7 and 9 September 2021. Forecast of meteorological conditions comes from most nested domain (domain with horizontal grid spacing 200 x 200 m).

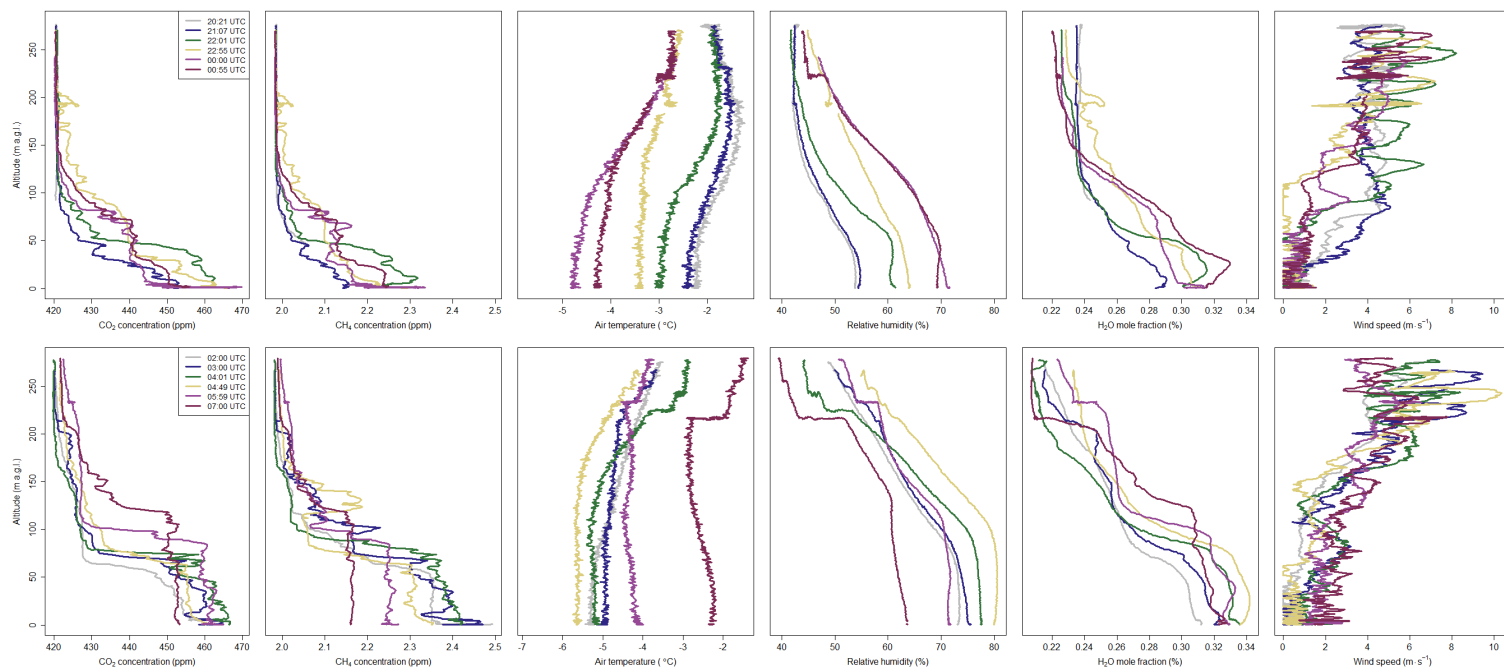

**Figure S5.** Vertical profiles of CO<sub>2</sub>, CH<sub>4</sub>, air temperature, relative humidity, H<sub>2</sub>O and wind speed on 10-11.03.2021 - campaign 1.

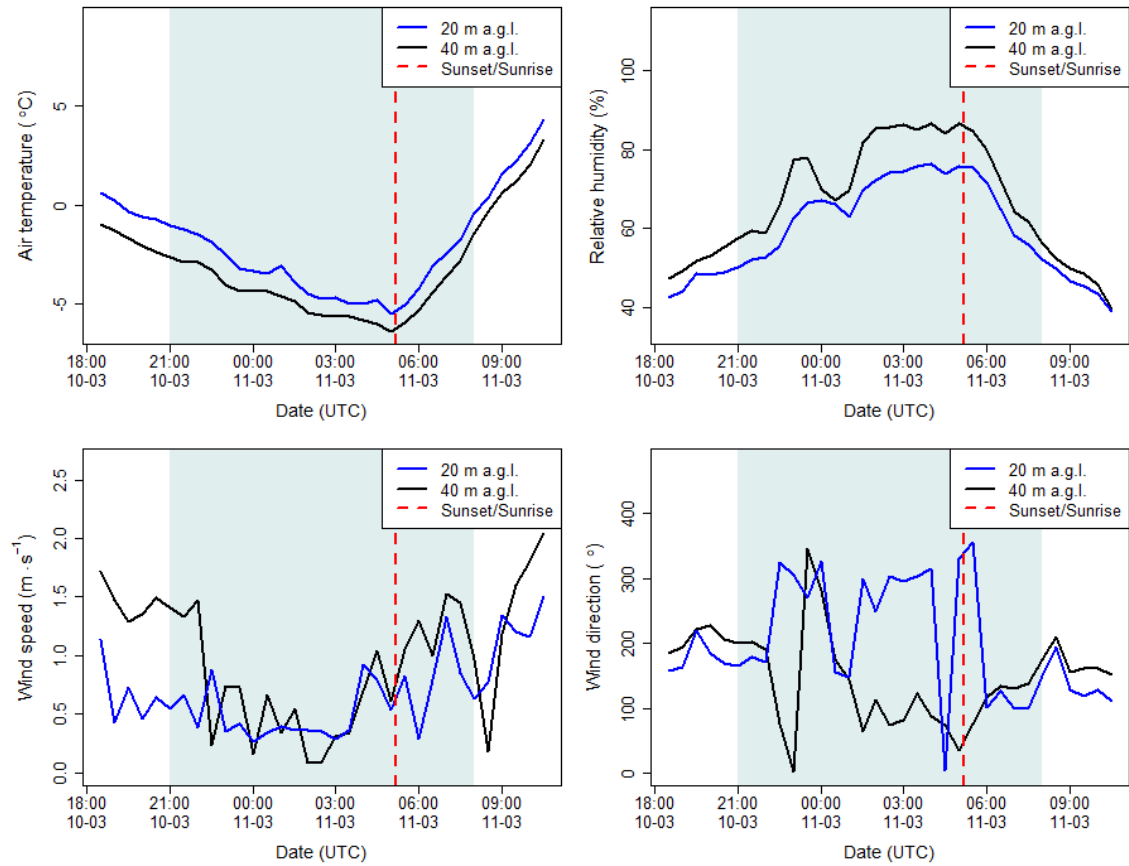

**Figure S6.** Time courses of air temperature, relative humidity, wind speed and wind direction at two altitudes (20 and 40 m a.g.l.) from measurement point at Reymonta St. on 10-11.03.2021 - campaign 1. Azure background presents campaign duration.

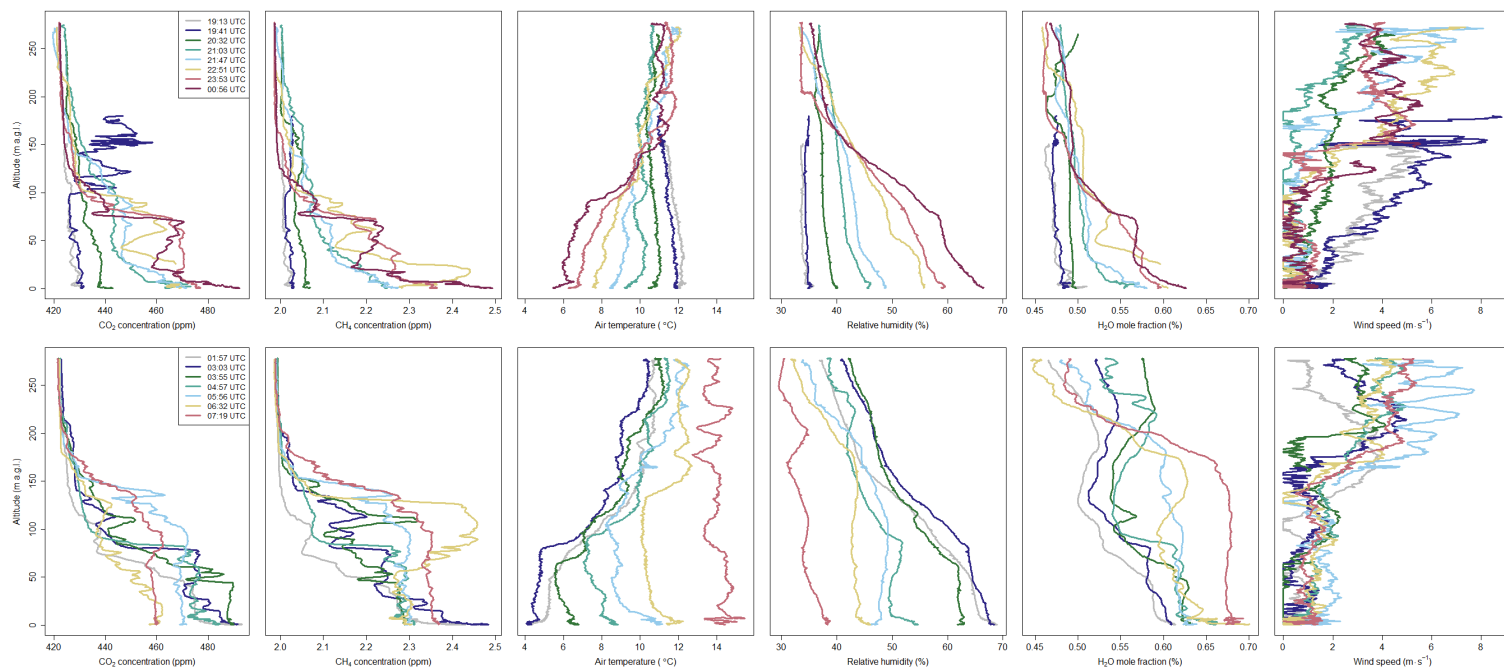

**Figure S7.** Vertical profiles of CO<sub>2</sub>, CH<sub>4</sub>, air temperature, relative humidity, H<sub>2</sub>O and wind speed on 28-29.04.2021 - campaign 2.

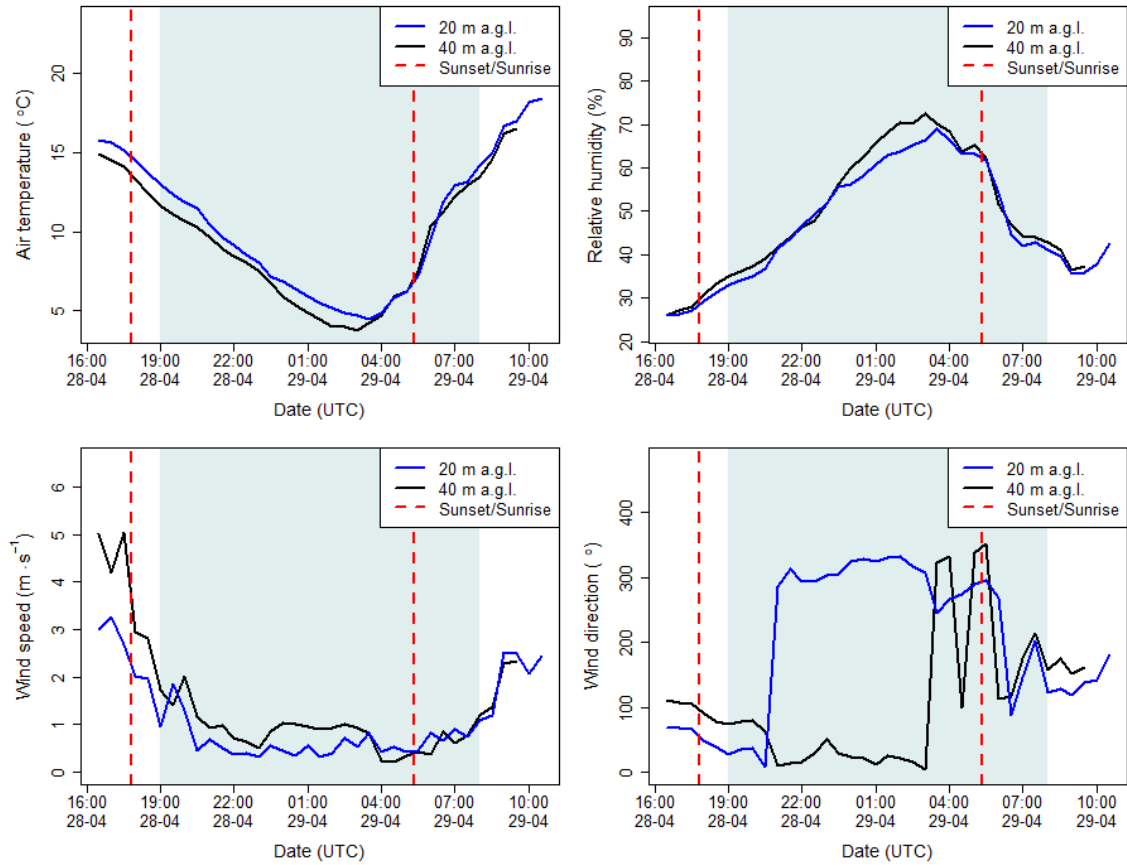

**Figure S8.** Time courses of air temperature, relative humidity, wind speed and wind direction at two altitudes (20 and 40 m a.g.l.) from measurement point at Reymonta St. on 28-29.04.2021 - campaign 2. Azure background presents campaign duration.



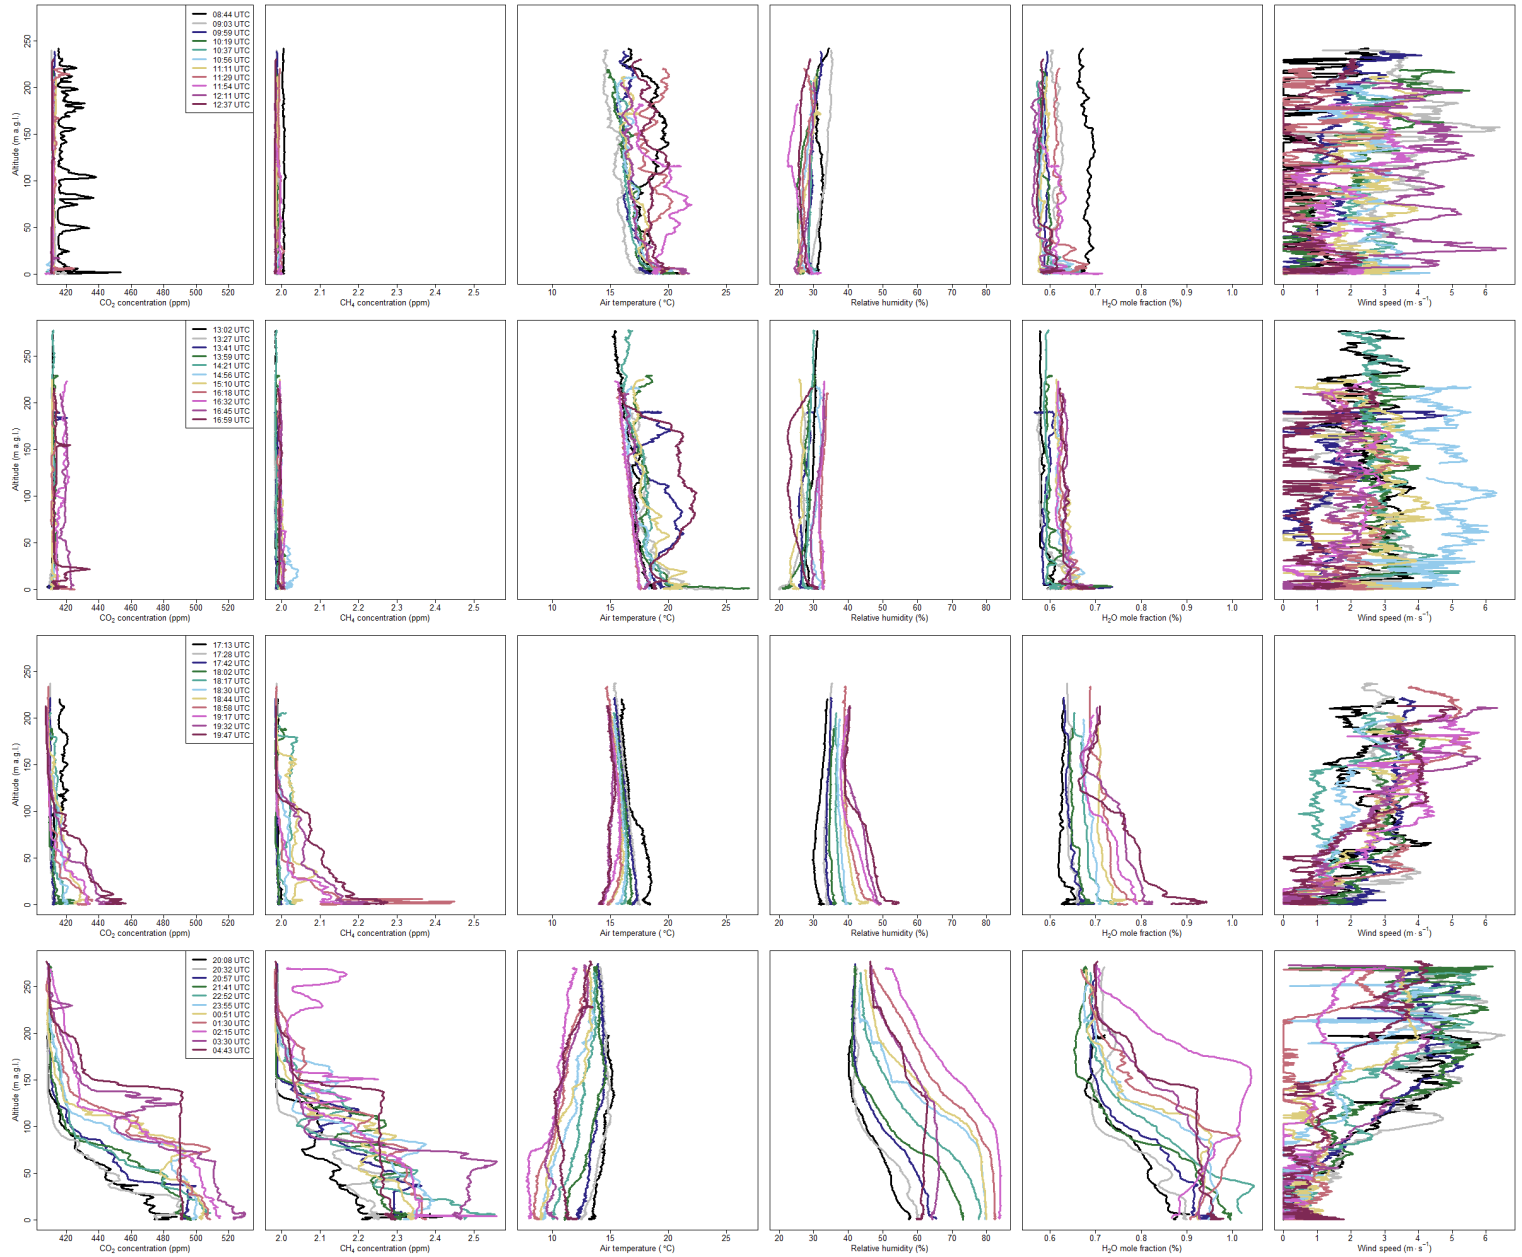

**Figure S9.** Vertical profiles of CO<sub>2</sub>, CH<sub>4</sub>, air temperature, relative humidity, H<sub>2</sub>O and wind speed on 01-02.06.2021 - campaign 3.

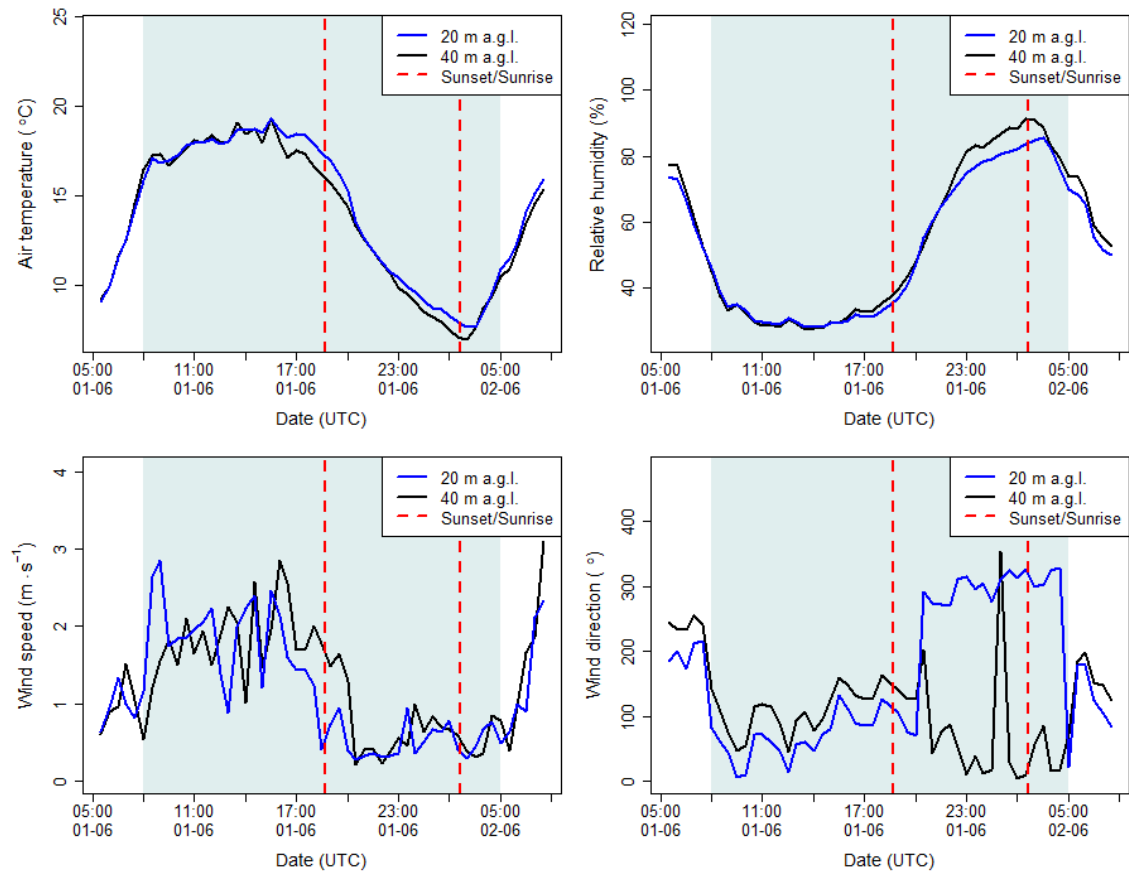

**Figure S10.** Time courses of air temperature, relative humidity, wind speed and wind direction at two altitudes (20 and 40 m a.g.l.) from measurement point at Reymonta St. on 01-02.06.2021 - campaign 3. Azure background presents campaign duration.

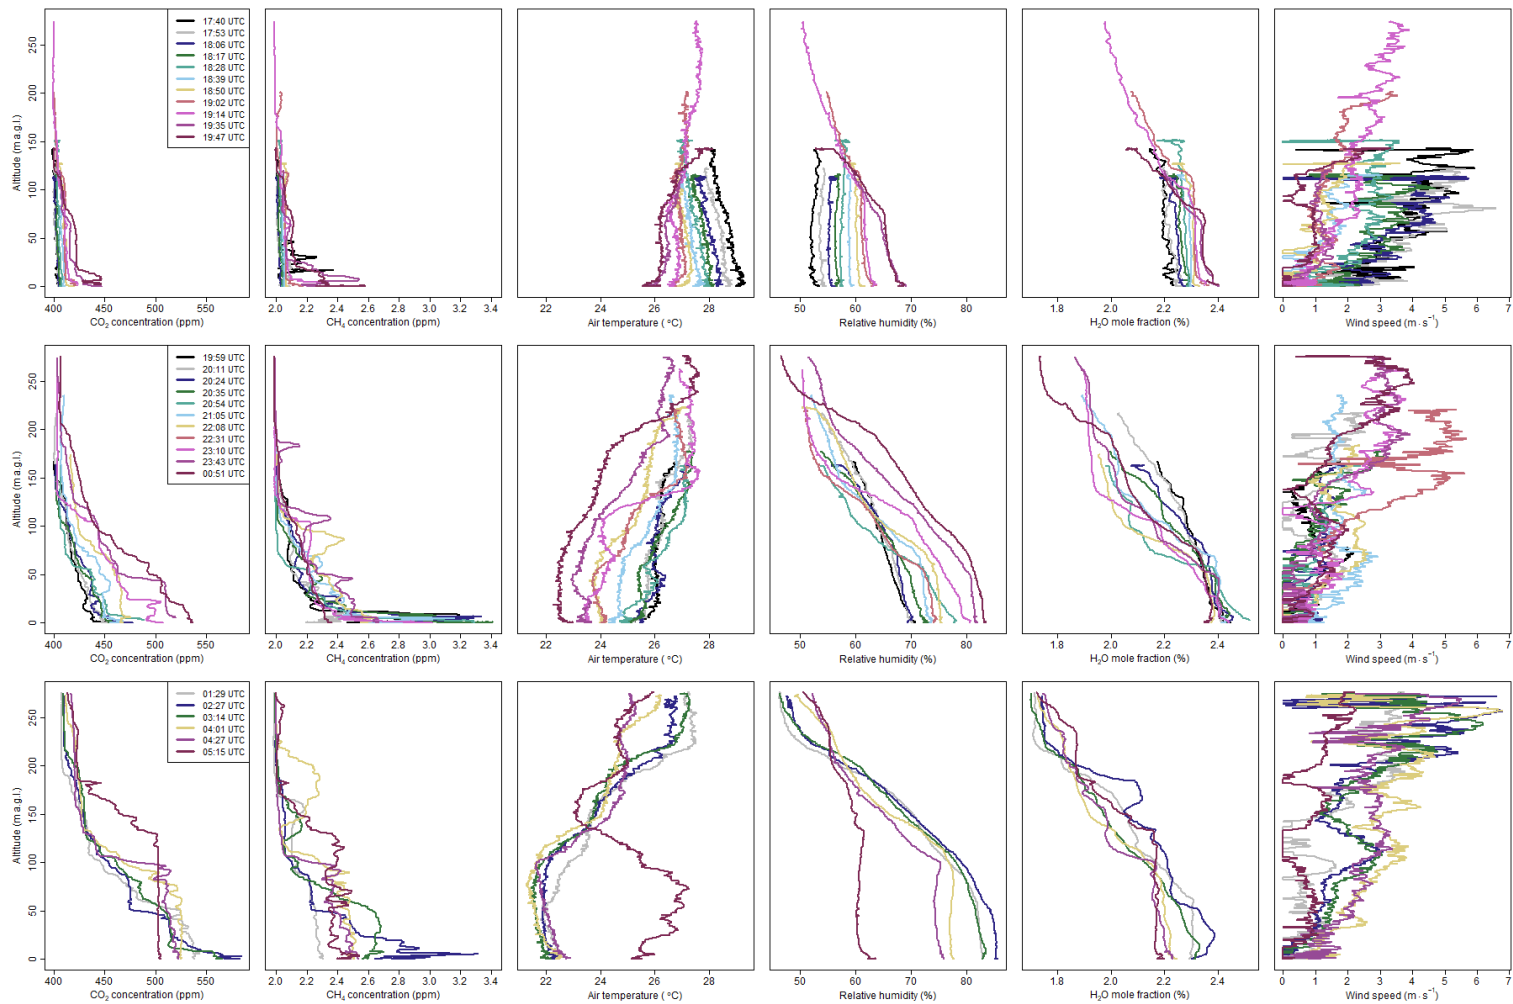

**Figure S11.** Vertical profiles of CO<sub>2</sub>, CH<sub>4</sub>, air temperature, relative humidity, H<sub>2</sub>O and wind speed on 13-14.07.2021 - campaign 4.

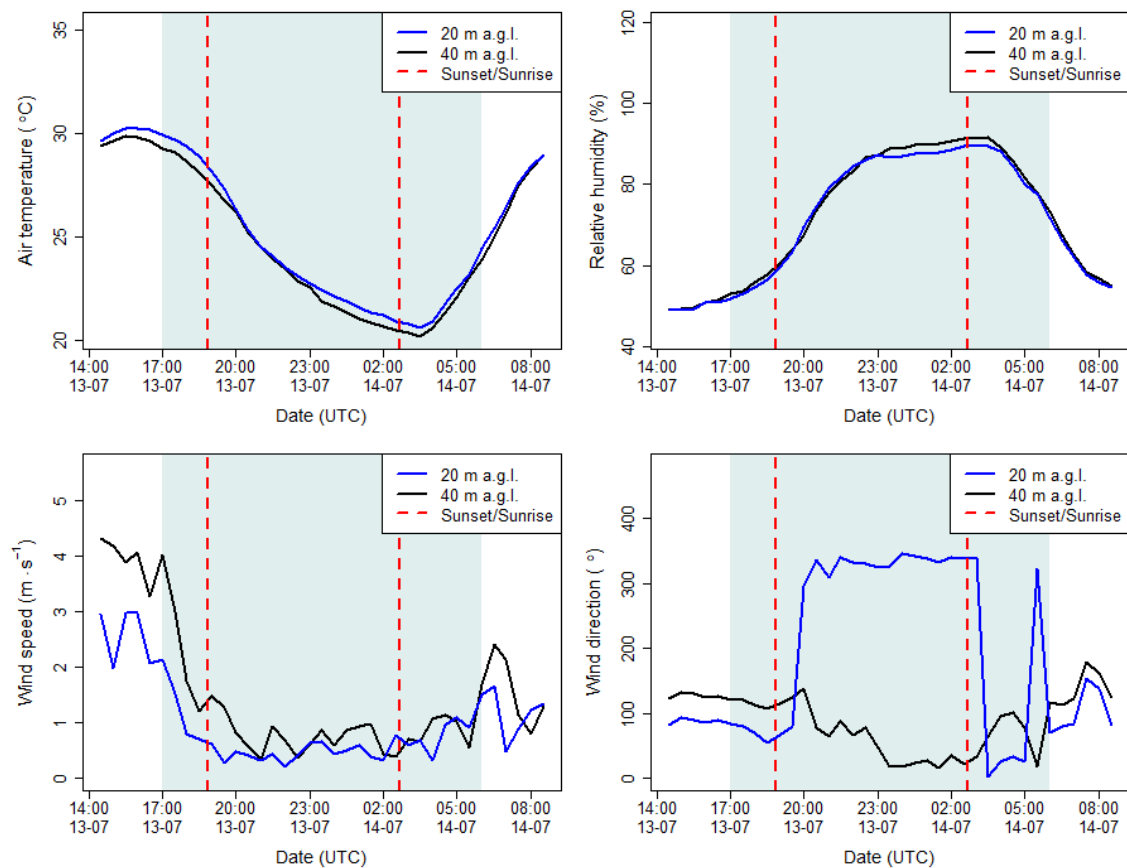

**Figure S12.** Time courses of air temperature, relative humidity, wind speed and wind direction at two altitudes (20 and 40 m a.g.l.) from measurement point at Reymonta St. on 13-14.07.2021 - campaign 4. Azure background presents campaign duration.

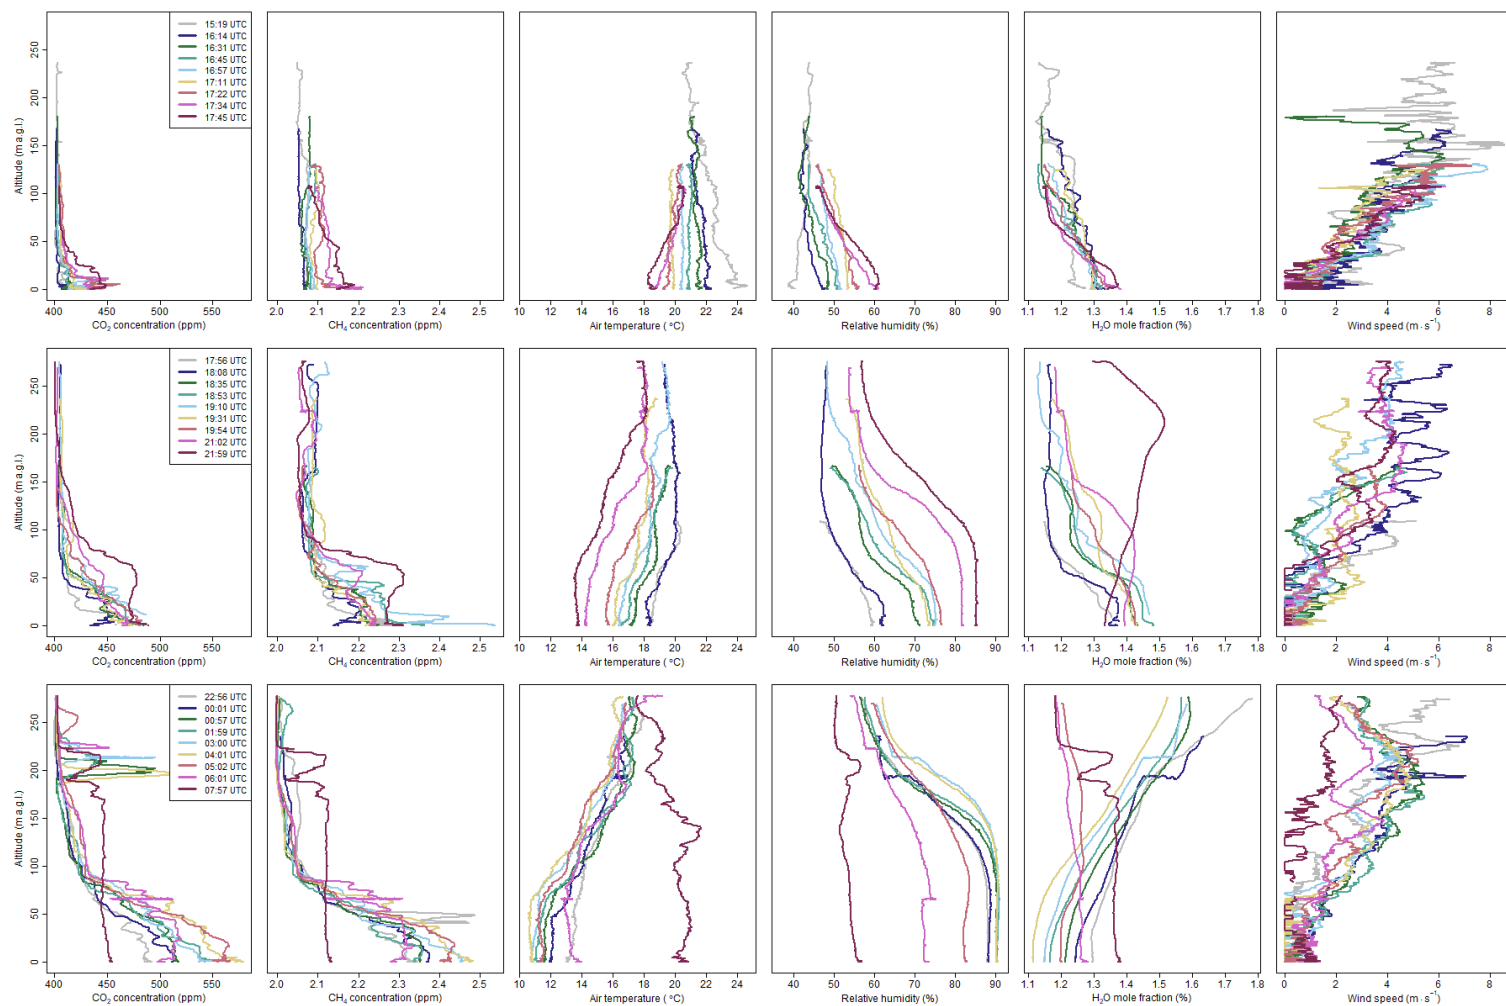

**Figure S13.** Vertical profiles of CO<sub>2</sub>, CH<sub>4</sub>, air temperature, relative humidity, H<sub>2</sub>O and wind speed on 07-08.09.2021 - campaign 5.

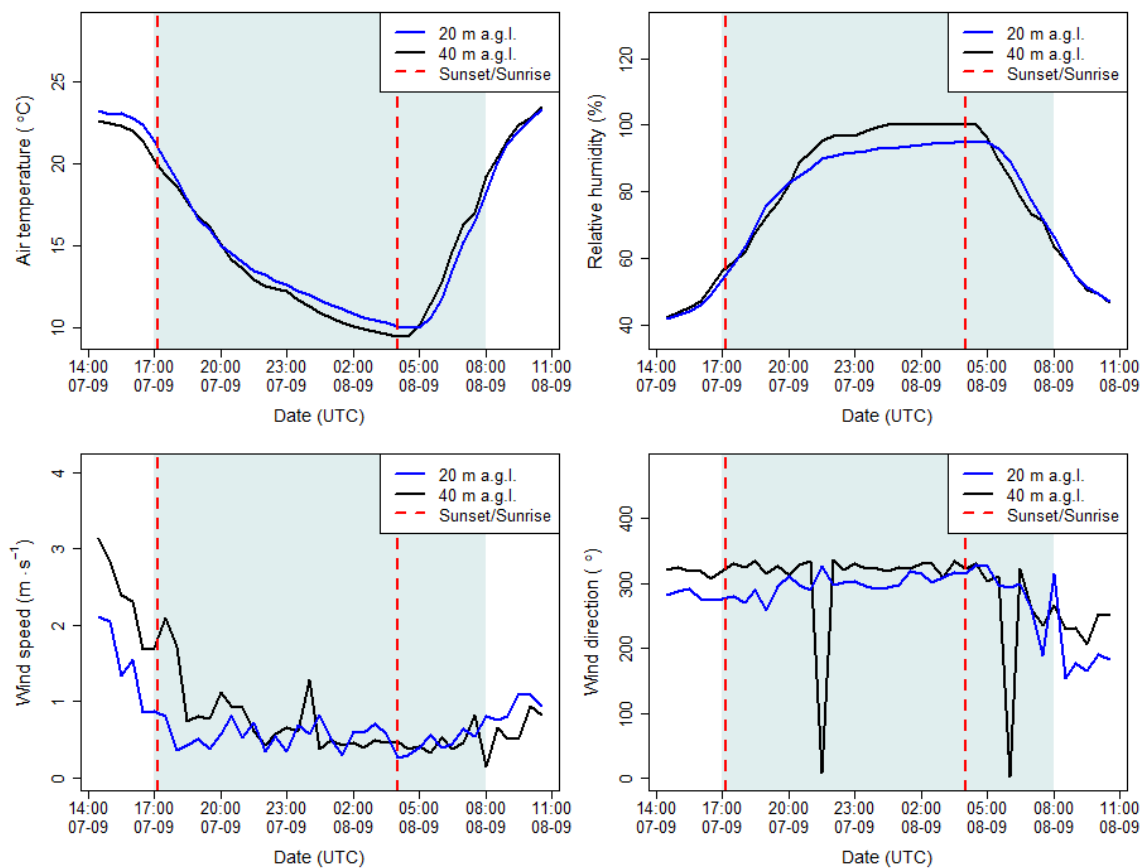

**Figure S14.** Time courses of air temperature, relative humidity, wind speed and wind direction at two altitudes (20 and 40 m a.g.l.) from measurement point at Reymonta St. on 07-08.09.2021 - campaign 5. Azure background presents campaign duration.

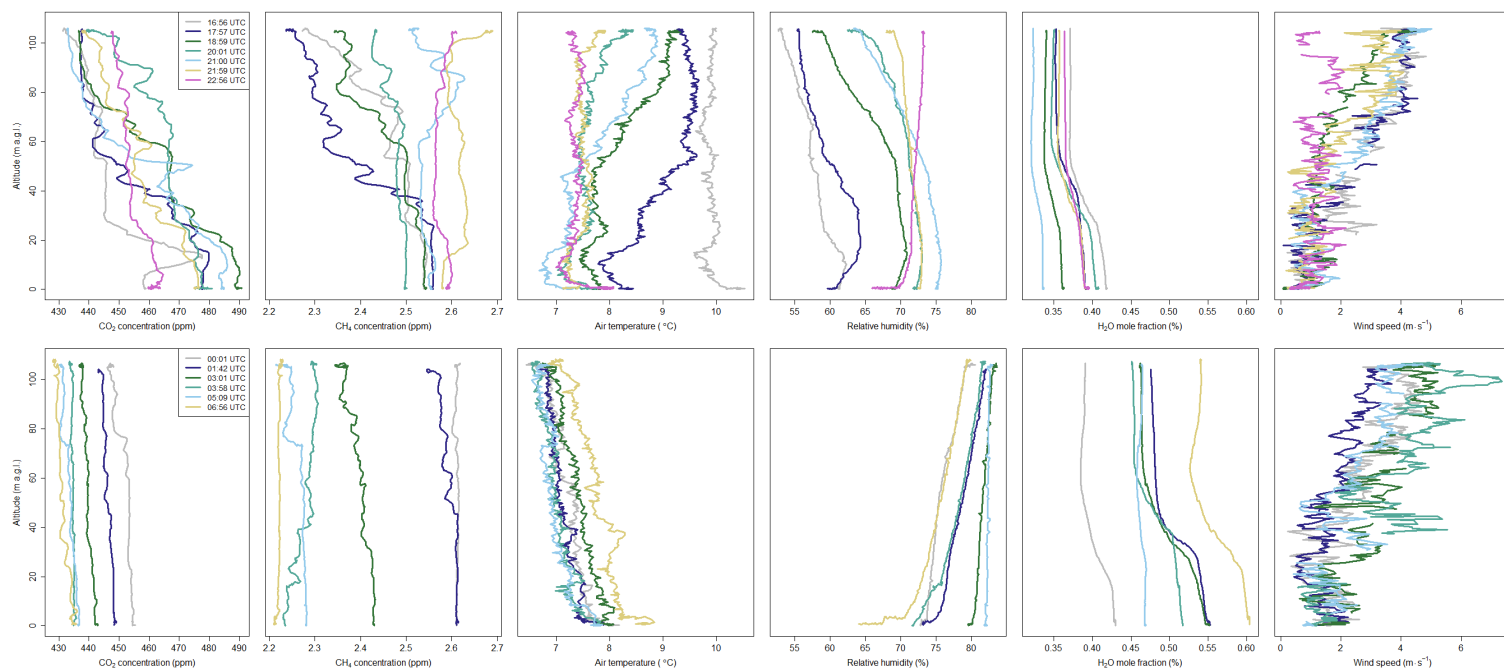

**Figure S15.** Vertical profiles of CO<sub>2</sub>, CH<sub>4</sub>, air temperature, relative humidity, H<sub>2</sub>O and wind speed on 11-12.10.2021 - campaign 6.

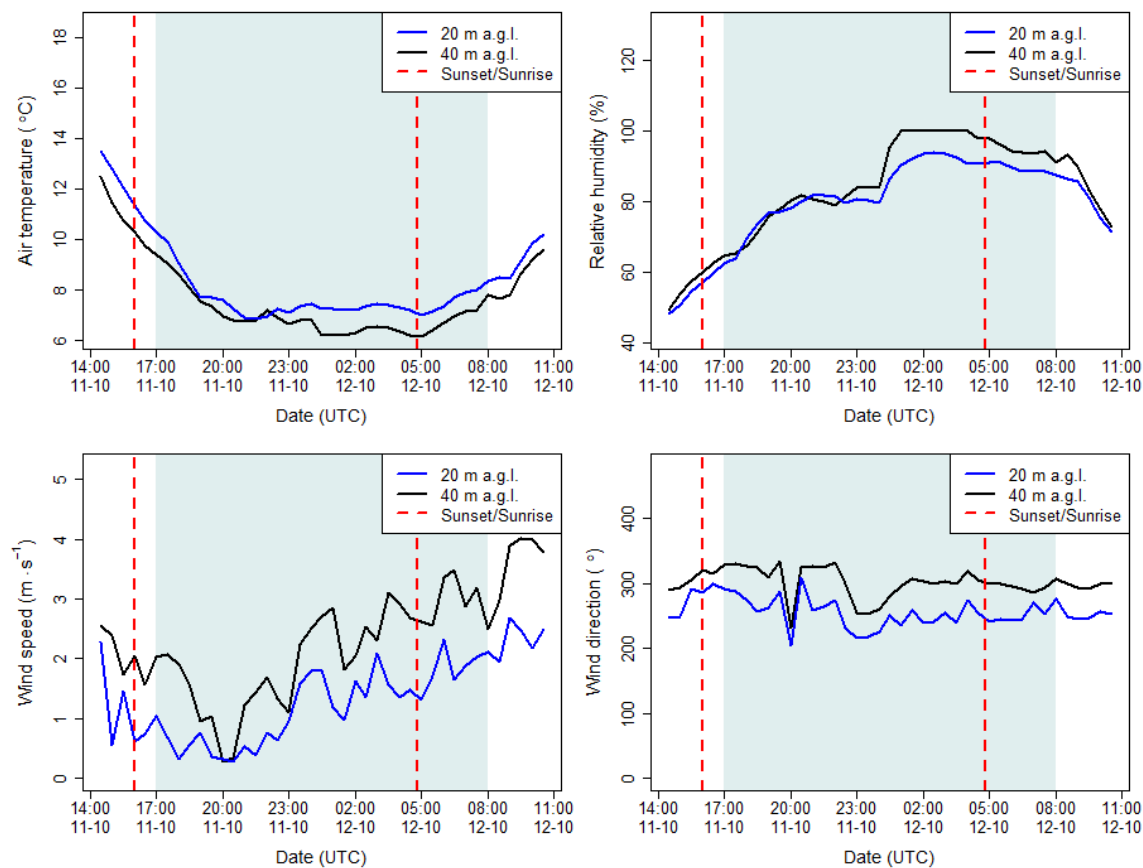

**Figure S16.** Time courses of air temperature, relative humidity, wind speed and wind direction at two altitudes (20 and 40 m a.g.l.) from measurement point at Reymonta St. on 11-12.10.2021 - campaign 6. Azure background presents campaign duration.



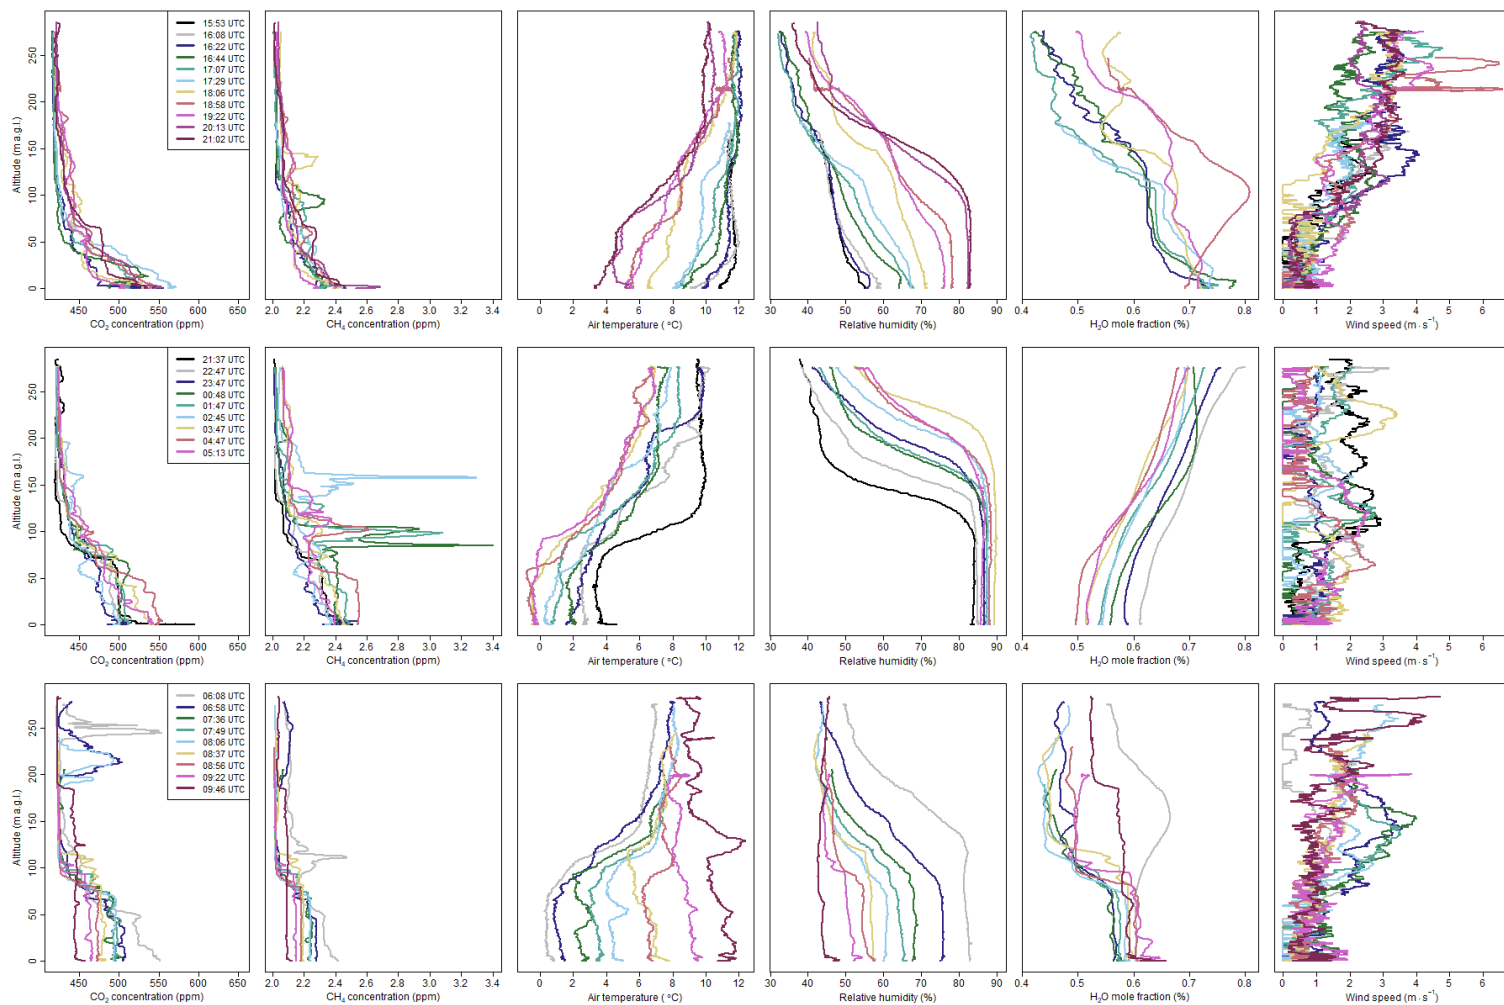

Figure S17. Vertical profiles of CO<sub>2</sub>, CH<sub>4</sub>, air temperature, relative humidity, H<sub>2</sub>O and wind speed on 25-26.10.2021 - campaign 7.

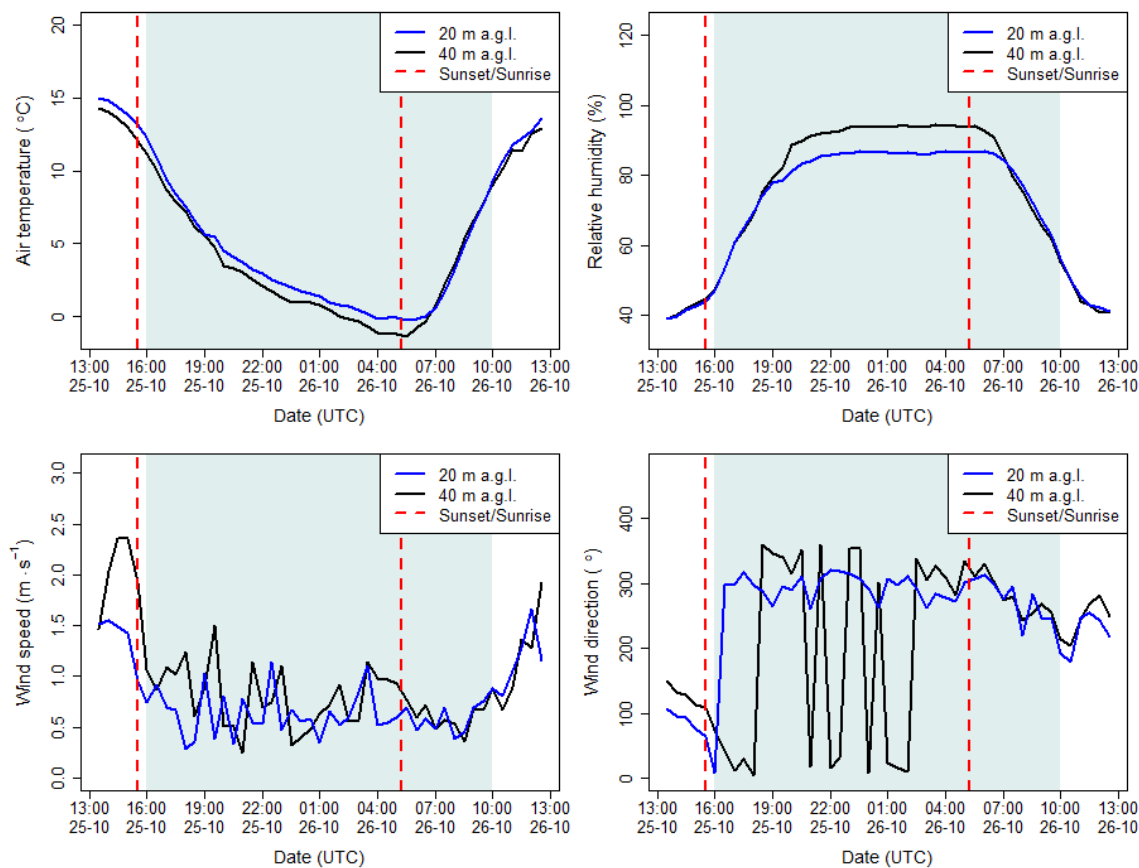

**Figure S18.** Time courses of air temperature, relative humidity, wind speed and wind direction at two altitudes (20 and 40 m a.g.l.) from measurement point at Reymonta St. on 25-26.10.2021 - campaign 7. Azure background presents campaign duration.

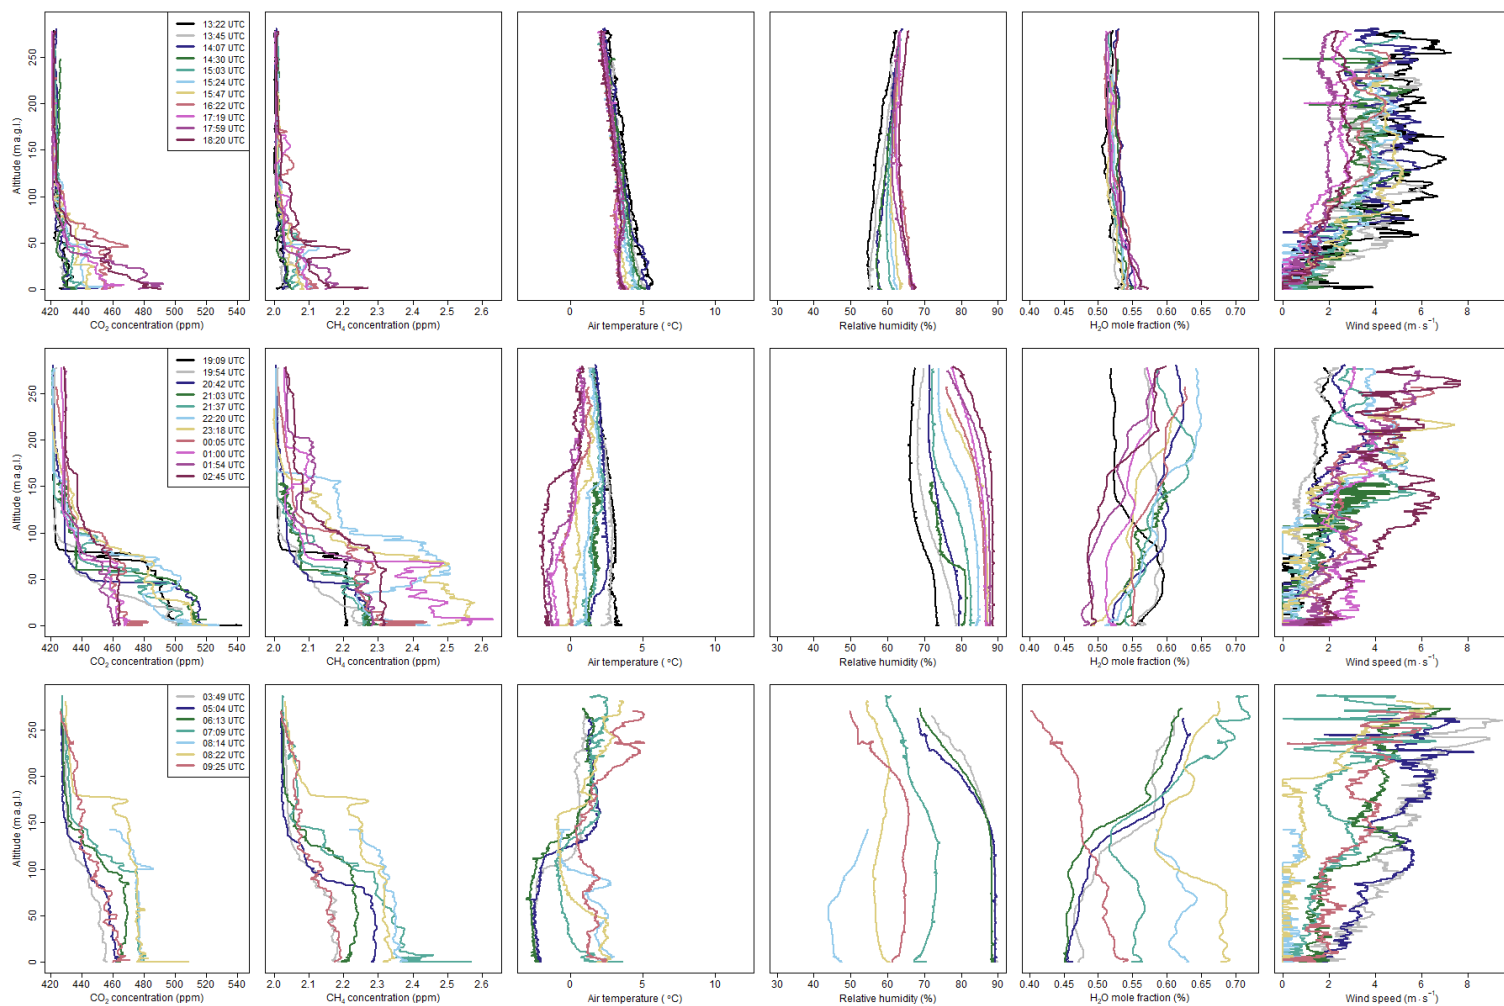

Figure S19. Vertical profiles of CO<sub>2</sub>, CH<sub>4</sub>, air temperature, relative humidity, H<sub>2</sub>O and wind speed on 24-25.11.2021 - campaign 8.

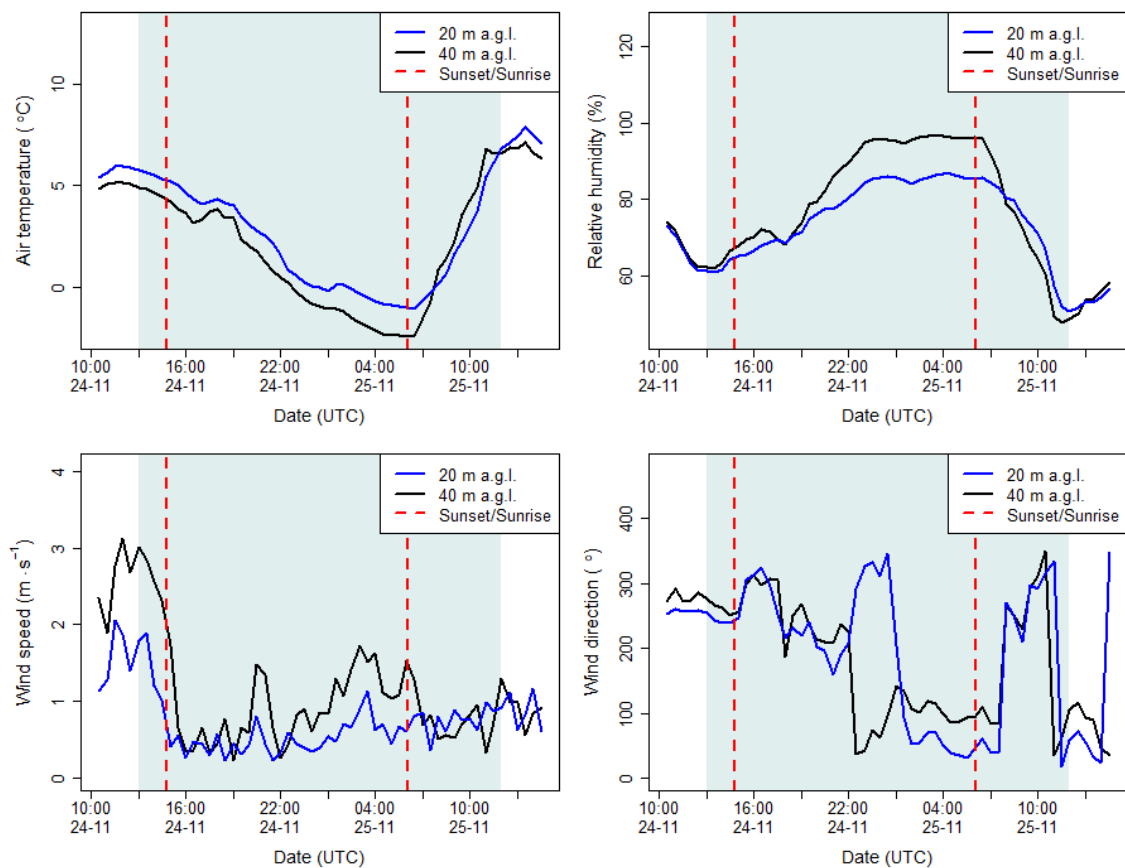

**Figure S20.** Time courses of air temperature, relative humidity, wind speed and wind direction at two altitudes (20 and 40 m a.g.l.) from measurement point at Reymonta St. on 24-25.11.2021 - campaign 8. Azure background presents campaign duration.

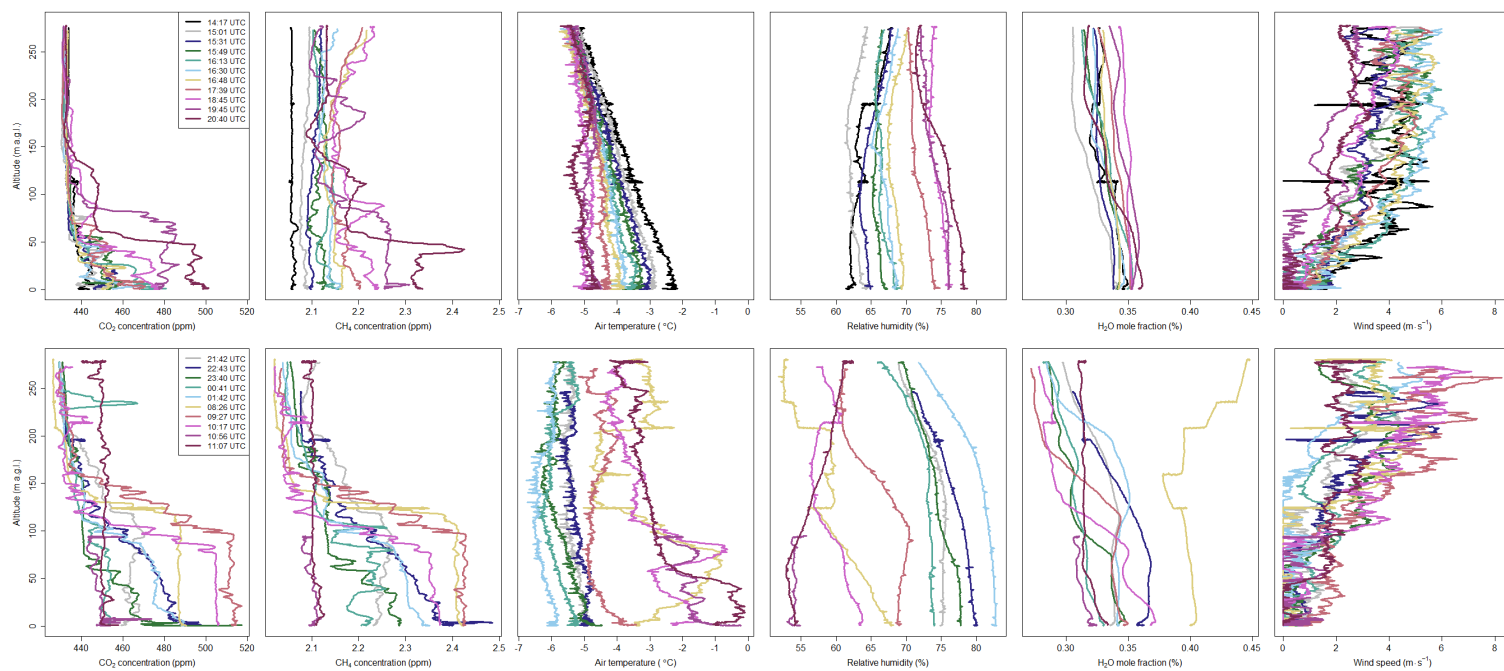

**Figure S21.** Vertical profiles of CO<sub>2</sub>, CH<sub>4</sub>, air temperature, relative humidity, H<sub>2</sub>O and wind speed on 22-23.12.2021 - campaign 9.

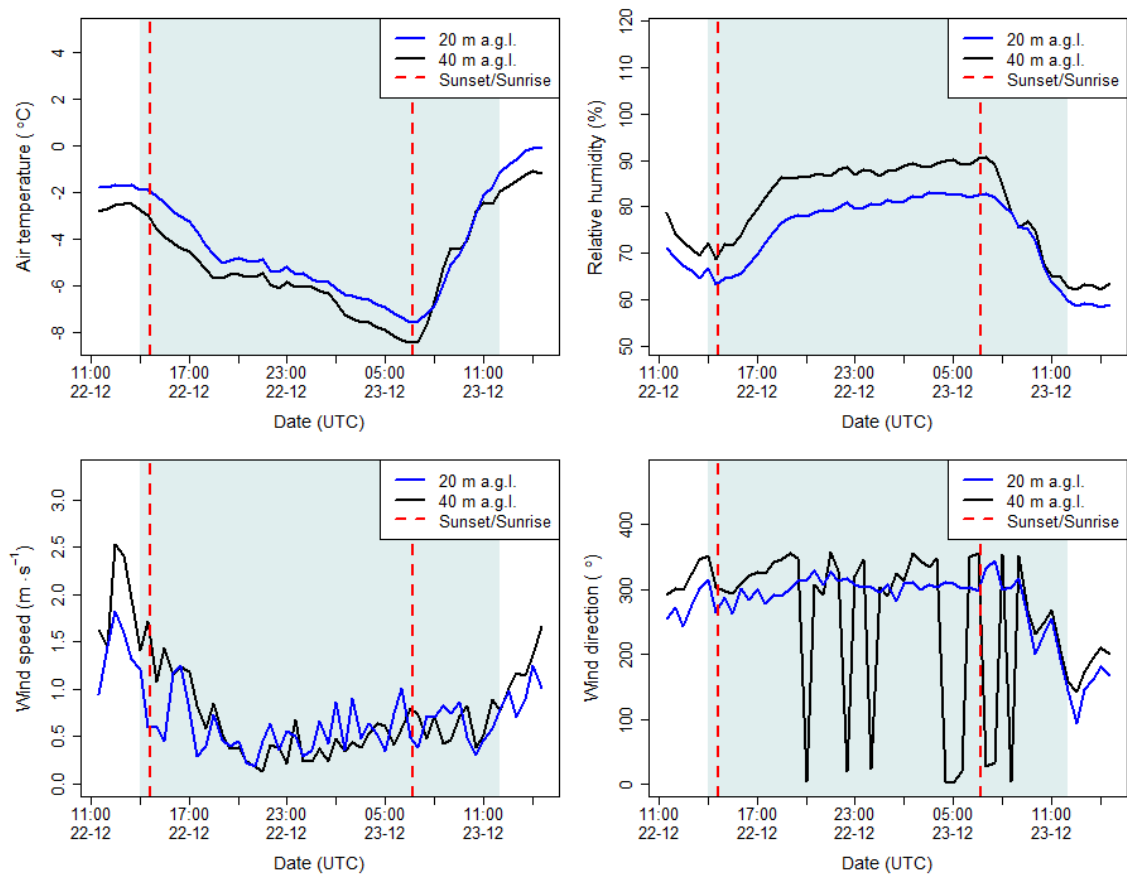

**Figure S22.** Time courses of air temperature, relative humidity, wind speed and wind direction at two altitudes (20 and 40 m a.g.l.) from measurement point at Reymonta St. on 22-23.12.2021 - campaign 9. Azure background presents campaign duration.

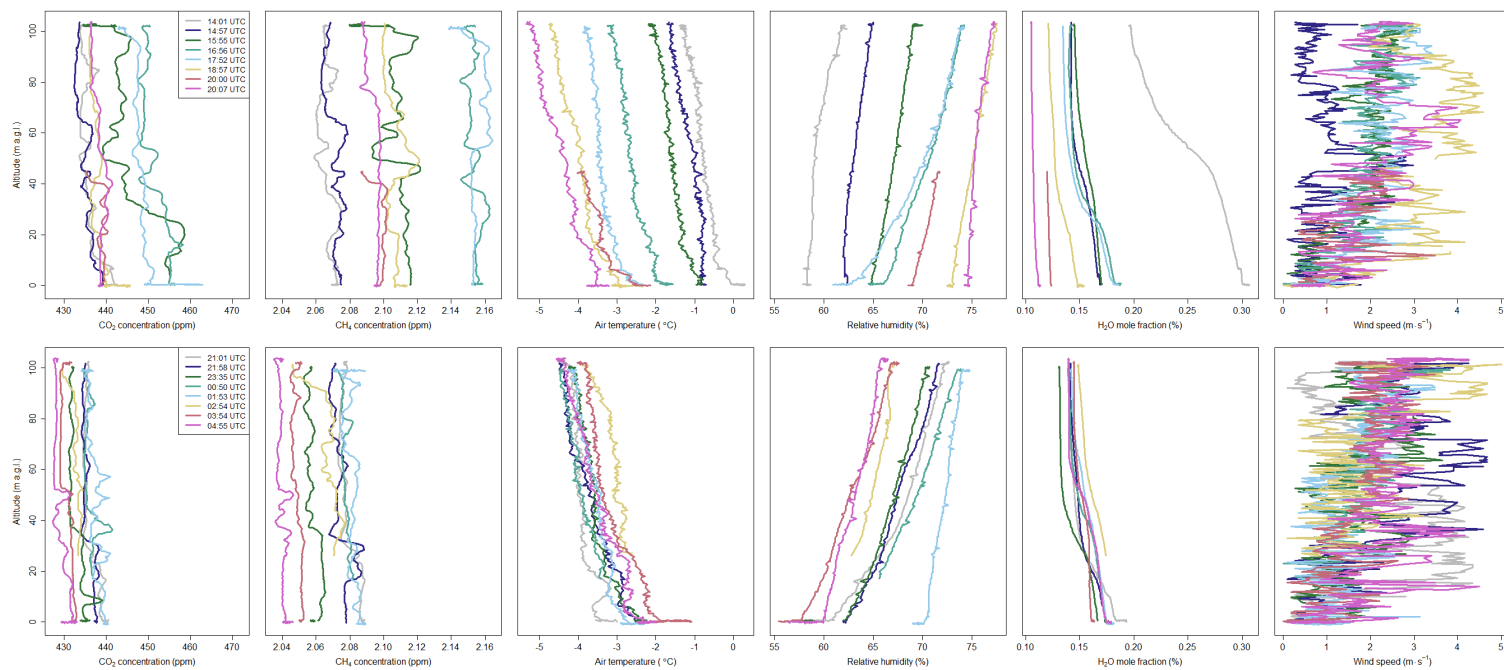

**Figure S23.** Vertical profiles of CO<sub>2</sub>, CH<sub>4</sub>, air temperature, relative humidity, H<sub>2</sub>O and wind speed on 11-12.01.2022 - campaign 10.

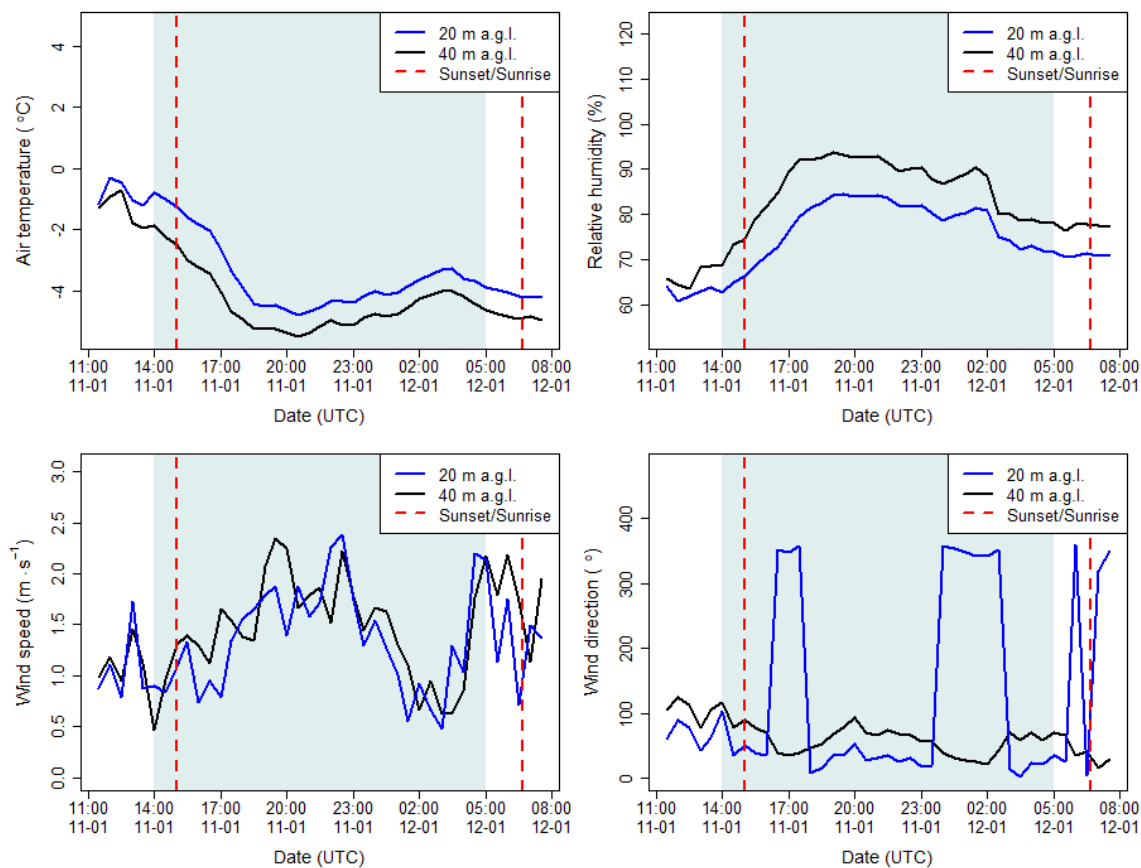

**Figure S24.** Time courses of air temperature, relative humidity, wind speed and wind direction at two altitudes (20 and 40 m a.g.l.) from measurement point at Reymonta St. on 11-12.01.2022 - campaign 10. Azure background presents campaign duration.



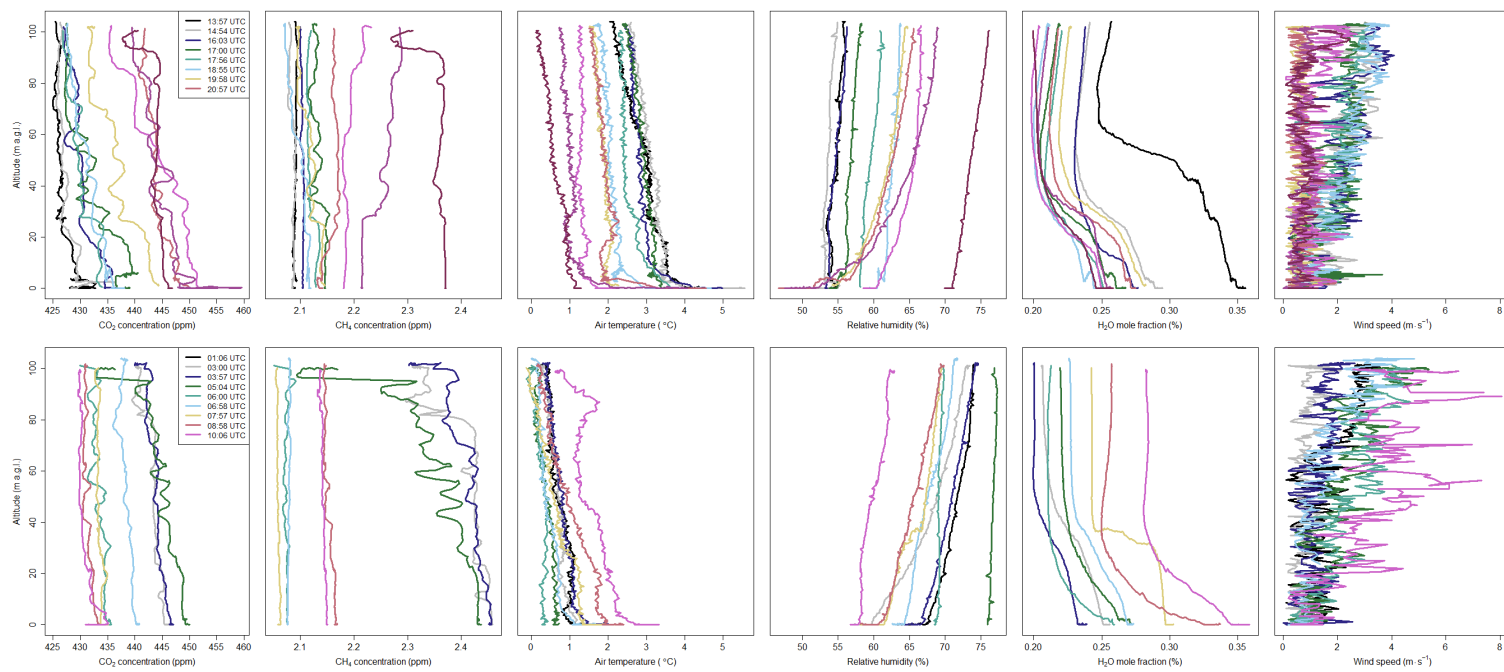

**Figure S25.** Vertical profiles of CO<sub>2</sub>, CH<sub>4</sub>, air temperature, relative humidity, H<sub>2</sub>O and wind speed on 31.01-1.02.2022 - campaign 11.

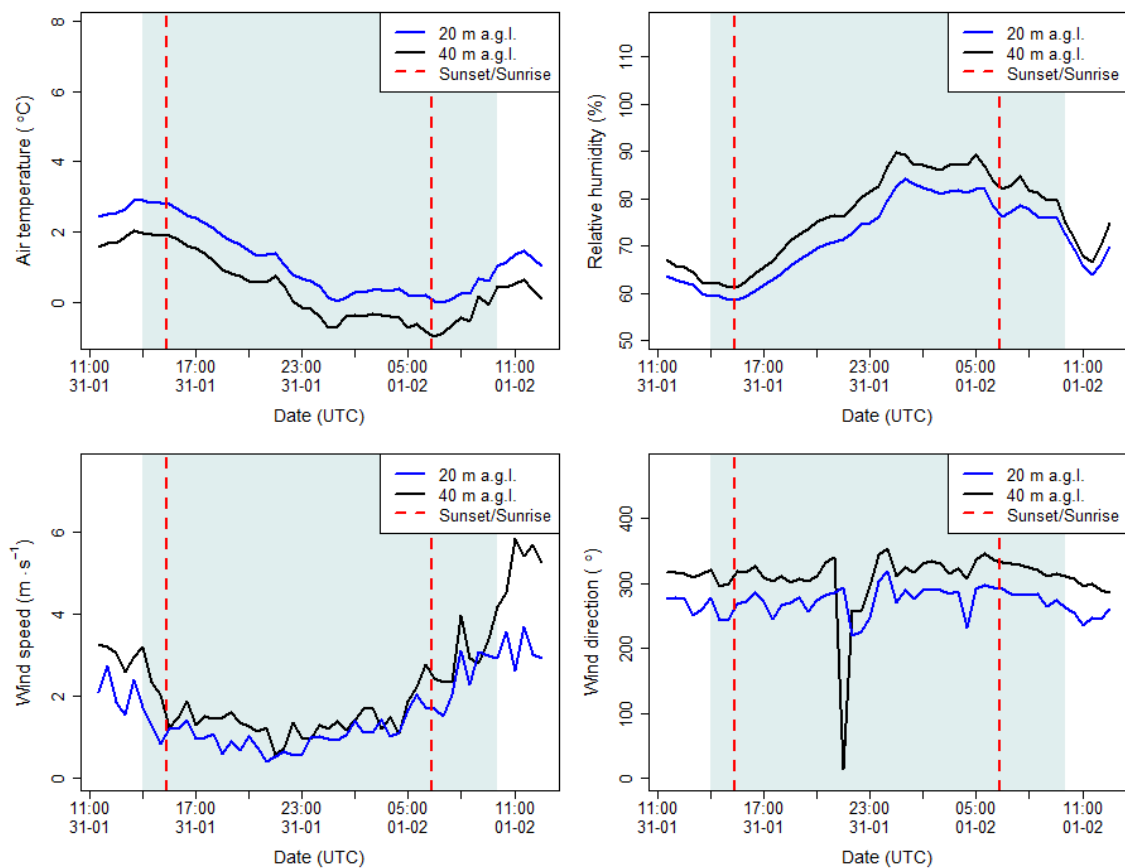

**Figure S26.** Time courses of air temperature, relative humidity, wind speed and wind direction at two altitudes (20 and 40 m a.g.l.) from measurement point at Reymonta St. on 31.01-1.02.2022 - campaign 11. Azure background presents campaign duration.
